# Supplementary material for: The importance of pre-training gap analyses and the identification of competencies and skill requirements of medical personnel for mass casualty incidents and disaster training
Source: Springer Nature journal article supplement (doi:10.1186/s12889-021-10165-5), 2021-01-09
Supplement: MOESM1 [file 18754132]

# Appendix 1

## Questionnaire

*Please read the questionnaire carefully and fill it in. When answering, please tick the appropriate boxes. The survey is completely anonymous. Your responses will only be used for statistical summaries.*

**1. Gender:**

Men

Women

**2. Length of service:**

Up to 5 years

6-10

11-15

16-20

20 years and over

**3. Occupation:**

physician

nurse

paramedic

**4. Does the facility where you currently work have an action plan for dealing with mass casualty incidents and disasters?**

Yes

No

I don't know

**5. Have you been familiarised with the procedures to be followed in the event of a mass casualty incident or disaster?**

Yes

No

**6. Do you know who is responsible for directing operations for mass casualty incidents and disasters in the facility where you work?**

Yes

No

**7. Do you know the rules of conduct in the event of evacuation during a mass casualty incident at your workplace?**

Yes

No

**8. Does your workplace have adequate logistics resources for mass casualty incidents?**

- Yes
- No
- I don't know

**9. Have there been any disaster preparedness exercises organised at the facility where you currently work?**

- Yes
- No

**10. Have you received training in preparation for a mass casualty incident or disaster (including epidemics) at your current workplace?**

- Yes
- No

**11. Do you have knowledge of triage?**

- Yes
- No

**12. Evaluation of the workplace, for a mass casualty incident or disaster in scale 1 to 10**

Very low 1 2 3 4 5 6 7 8 9 10 very well

**13. Evaluation of individual preparedness, for a mass casualty incident or disaster, in scale 1 to 10**

14. Very low 1 2 3 4 5 6 7 8 9 10 very well

*Thank you for completing the survey*
